# Supplementary material for: Molecular docking, network pharmacology and experimental verification to explore the mechanism of Wulongzhiyangwan in the treatment of pruritus
Source: PubMed Central journal article supplement (PMC9825397; doi:10.1038/s41598-023-27593-5), 2023-01-07

IgE-DNP/BSA-DNP

WLZYW

—

+

+

—

+

++

PI3K/AKT

Tubulin

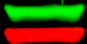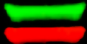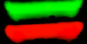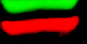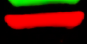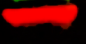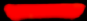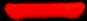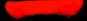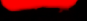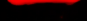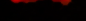

Supplement: 41598_2023_27593_MOESM2_ESM.pdf [file 41598_2023_27593_MOESM2_ESM.pdf]
